# Supplementary material
Source: Springer Nature journal article supplement (https://www.springermedizin.de/resource/supplementary/12998_2011_22_MOESM1_ESM.pdf/9679992)
Supplement: MOESM1 [file 9679992]

**P6:** *'I once had for servicing to a doctor of health insurance...he said "so, when are you going back to work?"...I answered "tomorrow if I could!"...I started crying because of the disappointment! I would have loved to be able to return to work!'*



**CODING**

**This narration fits into two categories (rows) for participant 6 (column) within the thematic framework (2 codes):**

- *Impact on future occupational impact (Category 1.C.)*
  - ⇒ Part of bigger theme of the impact on occupational live (Theme 1)
  
- *Communication/expression with health care professionals (Category 4.B.2.)*
  - ⇒ Part of bigger theme of Expression/communication/social interaction (Theme 4)
